# Supplementary material for: Validation of Ion TorrentTM Inherited Disease Panel with the PGMTM Sequencing Platform for Rapid and Comprehensive Mutation Detection
Source: PubMed Central journal article supplement (PMC5977207; doi:10.3390/genes9050267), 2018-05-22
Supplement: genes-09-00267-s001.pdf [file genes-09-00267-s001.pdf]

Article

# Validation of Ion Torrent™ Inherited Disease Panel with the PGM™ Sequencing Platform for Rapid and Comprehensive Mutation Detection

Abeer E. Mustafa <sup>1,4</sup>, Tariq Faquih <sup>2,4</sup>, Batoul Baz <sup>1</sup>, Rana Kattan <sup>4</sup>, Abdulelah Al-Issa <sup>4</sup>, Asma I. Tahir <sup>1</sup>, Faiqa Imtiaz <sup>2</sup>, Khushnooda Ramzan <sup>2</sup>, Moenaldeen Al-Sayed <sup>3</sup>, Mohammed Alowain <sup>3</sup>, Zuhair Al-Hassnan <sup>3</sup>, Hamad Al-Zaidan <sup>3</sup>, Mohamed Abouelhoda <sup>2,4</sup>, Bashayer R. Al-Mubarak <sup>1,4,\*</sup> and Nada A. Al Tassan <sup>1,4</sup>

- <sup>1</sup> Behavioral Genetics Unit, Department of Genetics, King Faisal Specialist Hospital & Research Center, P.O. Box 3354, Riyadh 11211, Saudi Arabia; almostafaa@sdl.com.sa (A.E.M.); bbaz@kfshrc.edu.sa (B.B.); bashairrashid@hotmail.com (A.I.T.); naltassan@kfshrc.edu.sa (N.A.A.T.)
- <sup>2</sup> Department of Genetics, King Faisal Specialist Hospital & Research Centre. P.O. Box 3354, Riyadh 11211, Saudi Arabia; tfaquih@kfshrc.edu.sa (T.F.); fahmad@kfshrc.edu.sa (F.I.); kramzan@kfshrc.edu.sa (K.R.); mabouelhoda@yahoo.com (M.Ab.)
- <sup>3</sup> Department of Medical Genetics, King Faisal Specialist Hospital & Research Centre, P.O. Box 3354, Riyadh 11211, Saudi Arabia; moeen@kfshrc.edu.sa (M.A.-S.); alowain@kfshrc.edu.sa (M.AL.); zhassnan@kfshrc.edu.sa (Z.A.-H.); hzaidan@kfshrc.edu.sa (H.A.-Z.)
- <sup>4</sup> Saudi Human Genome Program, King Abdulaziz City for Science & Technology, Riyadh, Saudi Arabia; ra.kattan@gmail.com (R.K.); Abdulbenissa@gmail.com (A.A.-I.)
- \* Correspondence: BAl-Mubarak@kfshrc.edu.sa

**Table S1.** IDP panel sequencing quality metrics.

| Bases in Target Regions | Average Base Coverage Depth | Target Base Coverage at 1x | Target Base Coverage at 20x | Target Base Coverage at 50x |
|-------------------------|-----------------------------|----------------------------|-----------------------------|-----------------------------|
| 1509563                 | 130.5                       | 98.94%                     | 95.46%                      | 90.82%                      |
| 1509563                 | 182.5                       | 99.14%                     | 96.03%                      | 93.48%                      |
| 1509563                 | 117.9                       | 98.76%                     | 94.01%                      | 89.54%                      |
| 1509563                 | 136.59                      | 98.07%                     | 94.26%                      | 89.93%                      |
| 1509563                 | 133.5                       | 98.86%                     | 94.67%                      | 89.68%                      |
| 1509563                 | 146.5                       | 98.91%                     | 95.86%                      | 92.11%                      |
| 1509563                 | 213.5                       | 99.20%                     | 96.89%                      | 95.01%                      |
| 1509563                 | 179.2                       | 98.99%                     | 95.95%                      | 93.10%                      |
| 1509563                 | 95.43                       | 98.54%                     | 92.14%                      | 83.94%                      |
| 1509563                 | 101.1                       | 98.66%                     | 93.81%                      | 86.36%                      |
| 1509563                 | 136.6                       | 98.87%                     | 94.31%                      | 88.79%                      |
| 1509563                 | 172.7                       | 98.68%                     | 92.73%                      | 88.32%                      |
| 1509563                 | 177.4                       | 99.24%                     | 96.65%                      | 93.98%                      |
| 1509563                 | 198.6                       | 99.23%                     | 96.73%                      | 94.28%                      |
| 1509563                 | 226.3                       | 99.32%                     | 97.12%                      | 95.44%                      |
| 1509563                 | 25.73                       | 98.16%                     | 67.76%                      | 68.13%                      |
| 1509563                 | 164.9                       | 98.93%                     | 95.69%                      | 92.11%                      |
| 1509563                 | 138.4                       | 98.87%                     | 94.81%                      | 89.69%                      |
| 1509563                 | 203                         | 99.12%                     | 96.78%                      | 94.75%                      |
| 1509563                 | 67.53                       | 98.63%                     | 91.35%                      | 79.25%                      |
| 1509563                 | 258.9                       | 99.34%                     | 97.04%                      | 95.62%                      |
| 1509563                 | 91.93                       | 98.94%                     | 93.67%                      | 84.47%                      |
| 1509563                 | 126.4                       | 98.51%                     | 92.97%                      | 87.01%                      |
| 1509563                 | 282.7                       | 99.41%                     | 97.13%                      | 95.93%                      |
| 1509563                 | 239.5                       | 98.02%                     | 77.80%                      | 75.42%                      |
| 1509563                 | 251                         | 99.30%                     | 97.27%                      | 96.13%                      |
| 1509563                 | 205.2                       | 99.19%                     | 96.55%                      | 94.27%                      |
| 1509563                 | 276.3                       | 98.89%                     | 94.46%                      | 89.56%                      |
| 1509563                 | 233.4                       | 99.18%                     | 96.13%                      | 94.02%                      |
| 1509563                 | 177.4                       | 99.16%                     | 95.35%                      | 91.73%                      |
| 1509563                 | 204.6                       | 99.10%                     | 96.05%                      | 93.14%                      |

|                |            |               |               |               |
|----------------|------------|---------------|---------------|---------------|
| 1509563        | 249.5      | 99.29%        | 96.97%        | 95.62%        |
| 1509563        | 197.3      | 98.73%        | 92.58%        | 88.66%        |
| 1509563        | 132.3      | 98.17%        | 89.47%        | 83.44%        |
| 1509563        | 369.7      | 99.62%        | 97.36%        | 96.54%        |
| 1509563        | 123        | 98.94%        | 94.78%        | 88.56%        |
| 1509563        | 293.6      | 99.40%        | 97.08%        | 95.80%        |
| 1509563        | 213        | 99.25%        | 96.12%        | 93.00%        |
| 1509563        | 244.4      | 98.60%        | 93.48%        | 90.89%        |
| 1509563        | 268.7      | 98.78%        | 92.75%        | 90.49%        |
| 1509563        | 202.8      | 99.06%        | 96.37%        | 93.96%        |
| 1509563        | 233.4      | 99.25%        | 96.80%        | 95.16%        |
| 1509563        | 401.6      | 99.35%        | 97.35%        | 96.59%        |
| 1509563        | 124.4      | 98.86%        | 95.25%        | 89.75%        |
| 1509563        | 41.21      | 97.61%        | 73.12%        | 61.79%        |
| 1509563        | 81.14      | 98.46%        | 90.23%        | 80.39%        |
| 1509563        | 362.2      | 99.31%        | 96.98%        | 95.96%        |
| 1509563        | 120.7      | 98.82%        | 94.40%        | 88.21%        |
| 1509563        | 252.6      | 99.30%        | 96.80%        | 95.25%        |
| 1509563        | 166        | 99.13%        | 96.12%        | 93.17%        |
| 1509563        | 199.6      | 98.89%        | 95.04%        | 92.26%        |
| 1509563        | 137.5      | 98.80%        | 93.70%        | 88.54%        |
| 1509563        | 382.8      | 99.25%        | 96.28%        | 94.76%        |
| 1509563        | 176.8      | 99.08%        | 96.15%        | 93.24%        |
| 1509563        | 267.3      | 99.32%        | 96.70%        | 94.52%        |
| 1509563        | 273.6      | 99.32%        | 97.16%        | 95.57%        |
| 1509563        | 243        | 99.26%        | 97.15%        | 95.04%        |
| 1509563        | 183.5      | 99.07%        | 96.14%        | 92.67%        |
| 1509563        | 135.7      | 99.21%        | 96.34%        | 80.91%        |
| 1509563        | 45.57      | 98.30%        | 84.74%        | 85.47%        |
| 1509563        | 352.5      | 99.42%        | 97.28%        | 88.22%        |
| 1509563        | 183        | 98.64%        | 92.81%        | 91.88%        |
| 1509563        | 106.6      | 96.80%        | 76.43%        | 78.20%        |
| 1509563        | 378.8      | 99.15%        | 95.73%        | 92.73%        |
| 1509563        | 306.9      | 99.34%        | 97.05%        | 93.03%        |
| 1509563        | 225.2      | 99.08%        | 95.39%        | 93.64%        |
| 1509563        | 166.3      | 99.16%        | 95.03%        | 88.24%        |
| 1509563        | 223        | 99.30%        | 96.55%        | 81.78%        |
| 1509563        | 121        | 98.89%        | 93.47%        | 91.94%        |
| 1509563        | 42.15      | 97.71%        | 89.10%        | 85.09%        |
| 1509563        | 279.6      | 99.42%        | 96.78%        | 92.04%        |
| 1509563        | 167.3      | 99.19%        | 94.87%        | 89.31%        |
| 1509563        | 147.6      | 98.99%        | 95.17%        | 93.66%        |
| 1509563        | 141.3      | 98.94%        | 94.13%        | 90.87%        |
| 1509563        | 283.8      | 99.30%        | 96.77%        | 91.84%        |
| 1509563        | 179        | 99.20%        | 95.87%        | 91.43%        |
| 1509563        | 173.85     | 98.76%        | 92.89%        | 86.41%        |
| 1509563        | 204.9      | 98.94%        | 93.23%        | 81.54%        |
| 1509563        | 184.04     | 95.90%        | 90.14%        | 85.83%        |
| 1509563        | 140.3      | 97.43%        | 81.75%        | 78.25%        |
| 1509563        | 186.65     | 62.89%        | 93.25%        | 90.05%        |
| 1509563        | 175.5      | 98.44%        | 90.00%        | 84.49%        |
| 1509563        | 138.1      | 98.14%        | 92.13%        | 89.31%        |
| 1509563        | 205        | 98.40%        | 93.39%        | 86.29%        |
| 1509563        | 138.8      | 98.19%        | 89.80%        | 84.56%        |
| 1509563        | 248        | 98.72%        | 92.74%        | 90.33%        |
| 1509563        | 112.6      | 95.55%        | 91.04%        | 90.54%        |
| 1509563        | 180.8      | 95.51%        | 65.52%        | 68.04%        |
| <b>1509563</b> | <b>191</b> | <b>98.36%</b> | <b>93.29%</b> | <b>89.34%</b> |

Table S2. Coverage per gene.

| Gene Name    | Average Coverage(%) |
|--------------|---------------------|
| <i>ABCA4</i> | 99.34078031         |
| <i>ABCC9</i> | 97.99463602         |
| <i>ABCD1</i> | 99.04655172         |

---

|                 |             |
|-----------------|-------------|
| <i>ACADVL</i>   | 99.21312261 |
| <i>ACTA2</i>    | 93.7816092  |
| <i>ACTC1</i>    | 99.60815047 |
| <i>ACTN2</i>    | 96.82243361 |
| <i>ADA</i>      | 99.74630542 |
| <i>AIPL1</i>    | 99.58098224 |
| <i>AIRE</i>     | 99.21896552 |
| <i>AKAP9</i>    | 99.08301405 |
| <i>ALPL</i>     | 99.5591616  |
| <i>AMT</i>      | 99.60613027 |
| <i>ANK2</i>     | 99.02724564 |
| <i>APC</i>      | 99.35476856 |
| <i>APP</i>      | 99.43915973 |
| <i>APTX</i>     | 96.78376437 |
| <i>ARL6</i>     | 99.48850575 |
| <i>ARSA</i>     | 99.21264368 |
| <i>ASL</i>      | 98.71264368 |
| <i>ASPA</i>     | 99.46394984 |
| <i>ATL1</i>     | 99.3136289  |
| <i>ATM</i>      | 97.93413293 |
| <i>ATP2A2</i>   | 99.57505071 |
| <i>ATP7A</i>    | 98.76213934 |
| <i>ATP7B</i>    | 99.5591133  |
| <i>ATXN1</i>    | 99.07910751 |
| <i>ATXN2</i>    | 96.45675972 |
| <i>ATXN7</i>    | 97.25431034 |
| <i>BAG3</i>     | 99.13464696 |
| <i>BCKDHA</i>   | 99.25574713 |
| <i>BCKDHB</i>   | 98.65747126 |
| <i>BEST1</i>    | 99.38642583 |
| <i>BMPRI1A</i>  | 99.22504537 |
| <i>BTD</i>      | 99.50957854 |
| <i>BTK</i>      | 99.3584117  |
| <i>CA4</i>      | 97.80747126 |
| <i>CACNA1C</i>  | 103.5992544 |
| <i>CACNB2</i>   | 98.41338259 |
| <i>CALR3</i>    | 99.30946065 |
| <i>CAPN3</i>    | 99.50076628 |
| <i>CASQ2</i>    | 97.45320197 |
| <i>CAV3</i>     | 99.38218391 |
| <i>CCDC39</i>   | 99.56584565 |
| <i>CCDC40</i>   | 99.5464191  |
| <i>CD113f-C</i> | 81.43103448 |
| <i>CDH23</i>    | 98.79757344 |
| <i>CEP290</i>   | 98.99676724 |
| <i>CERKL</i>    | 98.54454023 |
| <i>CFTR</i>     | 96.46952939 |
| <i>CHAT</i>     | 94.93199234 |
| <i>CHD7</i>     | 99.21209633 |
| <i>CHEK2</i>    | 99.38052027 |
| <i>CHM</i>      | 99.28735632 |
| <i>CHRNA1</i>   | 99.56178161 |
| <i>CHRNB1</i>   | 99.37088123 |
| <i>CHRND</i>    | 99.41176471 |
| <i>CHRNE</i>    | 98.40740741 |
| <i>CLCN1</i>    | 96.35446793 |
| <i>CNGB1</i>    | 98.58302764 |
| <i>COL11A1</i>  | 98.42142111 |
| <i>COL11A2</i>  | 96.52338214 |
| <i>COL1A1</i>   | 95.5862069  |
| <i>COL1A2</i>   | 98.26510938 |
| <i>COL2A1</i>   | 99.42736009 |
| <i>COL3A1</i>   | 99.50264057 |
| <i>COL4A1</i>   | 99.30176703 |
| <i>COL4A5</i>   | 99.33405172 |

---

---

|                |             |
|----------------|-------------|
| <i>COL5A1</i>  | 96.37859195 |
| <i>COL5A2</i>  | 99.49343186 |
| <i>COL7A1</i>  | 99.54853129 |
| <i>COL9A1</i>  | 99.0410509  |
| <i>CRB1</i>    | 99.65648604 |
| <i>CRX</i>     | 99.60775862 |
| <i>CTDP1</i>   | 97.20197044 |
| <i>CTNS</i>    | 99.40613027 |
| <i>CYP27A1</i> | 99.38074713 |
| <i>DBT</i>     | 99.29939792 |
| <i>DCX</i>     | 99.72605364 |
| <i>DES</i>     | 98.6903313  |
| <i>DHCR7</i>   | 99.07279693 |
| <i>DKC1</i>    | 99.5154265  |
| <i>DLD</i>     | 99.41431557 |
| <i>DMD</i>     | 98.74857327 |
| <i>DNAH11</i>  | 99.07557659 |
| <i>DNAH5</i>   | 98.98606988 |
| <i>DNAH9</i>   | 98.78019597 |
| <i>DNAI1</i>   | 97.54549808 |
| <i>DNAI2</i>   | 99.68481549 |
| <i>DNM2</i>    | 99.13514455 |
| <i>DOK7</i>    | 88.93678161 |
| <i>DSC2</i>    | 99.34163474 |
| <i>DSG2</i>    | 98.5545977  |
| <i>DSP</i>     | 99.39926564 |
| <i>DYSF</i>    | 99.12938403 |
| <i>ELN</i>     | 99.46788371 |
| <i>EMD</i>     | 98.90909091 |
| <i>ENG</i>     | 96.76392573 |
| <i>EXT1</i>    | 97.80096794 |
| <i>EYA1</i>    | 97.11724138 |
| <i>EYS</i>     | 98.96585865 |
| <i>F8</i>      | 99.48347701 |
| <i>F9</i>      | 99.51077586 |
| <i>FANCA</i>   | 99.2535497  |
| <i>FANCC</i>   | 99.44127936 |
| <i>FANCF</i>   | 99.62579821 |
| <i>FANCG</i>   | 99.57790549 |
| <i>FBN1</i>    | 99.44926108 |
| <i>FBXO7</i>   | 99.18874773 |
| <i>FGFR1</i>   | 99.6743295  |
| <i>FGFR3</i>   | 96.21609195 |
| <i>FMO3</i>    | 99.71336207 |
| <i>FOXL2</i>   | 83.87356322 |
| <i>FRG1</i>    | 99.08908046 |
| <i>FRMD7</i>   | 99.63278887 |
| <i>FSCN2</i>   | 95.5348659  |
| <i>FXN</i>     | 98.85057471 |
| <i>GAA</i>     | 97.08416759 |
| <i>GALT</i>    | 94.62260536 |
| <i>GATA4</i>   | 97.85727969 |
| <i>GBA</i>     | 99.60344828 |
| <i>GBE1</i>    | 96.9306637  |
| <i>GCSH</i>    | 99.63382594 |
| <i>GDF5</i>    | 94.20977011 |
| <i>GJB2</i>    | 99.85517241 |
| <i>GJB3</i>    | 99.70689655 |
| <i>GJB6</i>    | 99.53065134 |
| <i>GLA</i>     | 98.70645447 |
| <i>GLDC</i>    | 99.4216954  |
| <i>GNE</i>     | 98.14896552 |
| <i>GNPTAB</i>  | 98.76671891 |
| <i>GPC3</i>    | 99.29643073 |
| <i>GPD1L</i>   | 99.09814324 |

---

---

|                 |             |
|-----------------|-------------|
| <i>GPR143</i>   | 95.61755486 |
| <i>GUCY2D</i>   | 99.29118774 |
| <i>HBA2</i>     | 92.00766284 |
| <i>HCN4</i>     | 95.58422513 |
| <i>HEXA</i>     | 99.52528736 |
| <i>HFE</i>      | 99.62413793 |
| <i>HIBCH</i>    | 99.04761905 |
| <i>HMBS</i>     | 95.56168582 |
| <i>HR</i>       | 96.43869732 |
| <i>IDS</i>      | 99.2394636  |
| <i>IDUA</i>     | 91.86206897 |
| <i>IKBKAP</i>   | 99.52751284 |
| <i>IL2RG</i>    | 99.46360153 |
| <i>IMPDH1</i>   | 97.91354323 |
| <i>ITGB4</i>    | 99.35123422 |
| <i>JAG1</i>     | 98.33492976 |
| <i>JUP</i>      | 98.82183908 |
| <i>KCNE1</i>    | 99.77586207 |
| <i>KCNE2</i>    | 99.59003831 |
| <i>KCNE3</i>    | 99.70114943 |
| <i>KCNH2</i>    | 94.18295019 |
| <i>KCNJ2</i>    | 99.66666667 |
| <i>KCNQ1</i>    | 97.47701149 |
| <i>KCNQ4</i>    | 93.45977011 |
| <i>KIAA0196</i> | 98.54858934 |
| <i>KLHL7</i>    | 98.19827586 |
| <i>KRAS</i>     | 99.80114943 |
| <i>KRT14</i>    | 99.81685824 |
| <i>KRT5</i>     | 99.72485632 |
| <i>L1CAM</i>    | 99.51577403 |
| <i>LAMB3</i>    | 99.67784163 |
| <i>LAMP2</i>    | 99.37988506 |
| <i>LDB3</i>     | 96.70114943 |
| <i>LMNA</i>     | 99.69020252 |
| <i>LRAT</i>     | 99.49261084 |
| <i>LRRK2</i>    | 98.563446   |
| <i>MAPT</i>     | 93.31243469 |
| <i>MC1R</i>     | 82.49753695 |
| <i>MECP2</i>    | 98.07780725 |
| <i>MED12</i>    | 98.99799307 |
| <i>MEN1</i>     | 96.84815487 |
| <i>MERTK</i>    | 97.8772578  |
| <i>MFN2</i>     | 99.65217391 |
| <i>MLH1</i>     | 97.95759017 |
| <i>MMAA</i>     | 99.31877395 |
| <i>MMAB</i>     | 98.71264368 |
| <i>MMACHC</i>   | 98.72413793 |
| <i>MPZ</i>      | 99.30268199 |
| <i>MSH2</i>     | 99.17816092 |
| <i>MTM1</i>     | 99.3862069  |
| <i>MUT</i>      | 98.76657825 |
| <i>MYBPC3</i>   | 99.51402299 |
| <i>MYH11</i>    | 99.63385243 |
| <i>MYH6</i>     | 98.69262782 |
| <i>MYH7</i>     | 99.32081281 |
| <i>MYL2</i>     | 99.65517241 |
| <i>MYL3</i>     | 98.7164751  |
| <i>MYLK</i>     | 99.17177522 |
| <i>MYO7A</i>    | 98.99141393 |
| <i>MYOZ2</i>    | 99.58748404 |
| <i>NF1</i>      | 98.5408626  |
| <i>NF2</i>      | 99.71206897 |
| <i>NIPBL</i>    | 98.6032314  |
| <i>NKX2-5</i>   | 98.14712644 |
| <i>NPC1</i>     | 99.25788388 |

---

---

|                 |             |
|-----------------|-------------|
| <i>NPC2</i>     | 99.12212644 |
| <i>NR2E3</i>    | 97.68719212 |
| <i>NRAS</i>     | 91.32183908 |
| <i>NSD1</i>     | 99.65694076 |
| <i>OCA2</i>     | 98.4453096  |
| <i>OCRL</i>     | 97.35440613 |
| <i>OTC</i>      | 99.10536398 |
| <i>PABPN1</i>   | 83.46708464 |
| <i>PAFAH1B1</i> | 99.62422635 |
| <i>PAH</i>      | 99.68199234 |
| <i>PAX3</i>     | 99.34180278 |
| <i>PAX6</i>     | 99.4448952  |
| <i>PCDH15</i>   | 99.06134723 |
| <i>PEX1</i>     | 96.87164751 |
| <i>PEX10</i>    | 99.26666667 |
| <i>PEX13</i>    | 99.4954023  |
| <i>PEX14</i>    | 98.93545535 |
| <i>PEX19</i>    | 99.64712644 |
| <i>PEX26</i>    | 99.51954023 |
| <i>PEX3</i>     | 99.2353297  |
| <i>PEX5</i>     | 99.348659   |
| <i>PINK1</i>    | 98.3256705  |
| <i>PKD1</i>     | 98.06270915 |
| <i>PKHD1</i>    | 98.77927443 |
| <i>PKP2</i>     | 99.53639847 |
| <i>PLEC</i>     | 97.41167109 |
| <i>PLN</i>      | 99.46551724 |
| <i>PLOD1</i>    | 99.08745627 |
| <i>PMM2</i>     | 95.73180077 |
| <i>PMP22</i>    | 99.33793103 |
| <i>POLG</i>     | 99.53898726 |
| <i>PPT1</i>     | 99.70019157 |
| <i>PRCD</i>     | 97.96934866 |
| <i>PRKAG2</i>   | 99.49952107 |
| <i>PROM1</i>    | 98.79310345 |
| <i>PRPF31</i>   | 98.84310345 |
| <i>PRPF8</i>    | 99.58215962 |
| <i>PRPH2</i>    | 99.73132184 |
| <i>PSEN1</i>    | 99.66091954 |
| <i>PSEN2</i>    | 96.36646383 |
| <i>PTCH1</i>    | 99.39276703 |
| <i>PTPN11</i>   | 98.24137931 |
| <i>RAF1</i>     | 99.70833333 |
| <i>RAG1</i>     | 99.64942529 |
| <i>RAG2</i>     | 99.67126437 |
| <i>RAI1</i>     | 99.17659352 |
| <i>RAPSN</i>    | 98.00153257 |
| <i>RB1</i>      | 98.47459165 |
| <i>RDH12</i>    | 99.67471264 |
| <i>RET</i>      | 99.11832319 |
| <i>RHO</i>      | 91.51724138 |
| <i>ROR2</i>     | 99.27936032 |
| <i>RP9</i>      | 98.05363985 |
| <i>RPE65</i>    | 99.27789047 |
| <i>RPGR</i>     | 97.18304598 |
| <i>RPGRIP1</i>  | 99.43087916 |
| <i>RPL11</i>    | 99.39846743 |
| <i>RPL35A</i>   | 98.90804598 |
| <i>RPS10</i>    | 99.61685824 |
| <i>RPS19</i>    | 95.14367816 |
| <i>RPS24</i>    | 97.78787879 |
| <i>RPS26</i>    | 99.73180077 |
| <i>RPS6KA3</i>  | 99.432703   |
| <i>RPS7</i>     | 97.6683087  |
| <i>RS1</i>      | 99.64623244 |

---

---

|                         |                    |
|-------------------------|--------------------|
| <i>RSPH4A</i>           | 99.45916515        |
| <i>RSPH9</i>            | 99.40689655        |
| <i>RYR1</i>             | 97.11906186        |
| <i>RYR2</i>             | 99.41177657        |
| <i>SALL4</i>            | 97.48898467        |
| <i>SCN1B</i>            | 89.55977011        |
| <i>SCN3B</i>            | 95.37356322        |
| <i>SCN4B</i>            | 99.67323481        |
| <i>SCN5A</i>            | 99.63199234        |
| <i>SCN9A</i>            | 99.11624027        |
| <i>SEMA4A</i>           | 95.64477285        |
| <i>SERPINA1</i>         | 99.61494253        |
| <i>SERPING1</i>         | 99.62972085        |
| <i>SGCD</i>             | 99.36015326        |
| <i>SH3BP2</i>           | 98.107683          |
| <i>SIX1</i>             | 97.49137931        |
| <i>SIX5</i>             | 93.63218391        |
| <i>SLC25A13</i>         | 96.88773946        |
| <i>SLC25A4</i>          | 89.52745849        |
| <i>SLC26A4</i>          | 99.60881226        |
| <i>SMAD3</i>            | 96.79386973        |
| <i>SMAD4</i>            | 99.78265413        |
| <i>SNCA</i>             | 99.61685824        |
| <i>SNRNP200</i>         | 99.57653713        |
| <i>SNTA1</i>            | 93.78304598        |
| <i>SOD1</i>             | 99.59961686        |
| <i>SOS1</i>             | 97.2384494         |
| <i>SOX9</i>             | 93.65163572        |
| <i>SPATA7</i>           | 98.96751624        |
| <i>SPG7</i>             | 99.18206897        |
| <i>STARD3</i>           | 93.61460446        |
| <i>TAF1</i>             | 98.81331748        |
| <i>TAZ</i>              | 98.933687          |
| <i>TBX5</i>             | 99.62474645        |
| <i>TCOF1</i>            | 99.34874052        |
| <i>TGFBR1</i>           | 97.84719405        |
| <i>TGFBR2</i>           | 99.78951149        |
| <i>TMEM43</i>           | 95.05977011        |
| <i>TNNC1</i>            | 99.75533662        |
| <i>TNNI3</i>            | 99.2112069         |
| <i>TNNT1</i>            | 91.86453202        |
| <i>TNNT2</i>            | 99.6653144         |
| <i>TNXB</i>             | 96.64730135        |
| <i>TOPORS</i>           | 99.50679206        |
| <i>TP53</i>             | 99.5348659         |
| <i>TPM1</i>             | 98.32123412        |
| <i>TRPP2</i>            | 97.92944907        |
| <i>TSC1</i>             | 99.4969574         |
| <i>TSC2</i>             | 98.70729291        |
| <i>TTPA</i>             | 98.90229885        |
| <i>TTR</i>              | 99.71264368        |
| <i>TULP1</i>            | 94.77701149        |
| <i>TWIST1</i>           | 97.55172414        |
| <i>TXNDC3</i>           | 99.07105538        |
| <i>TYR</i>              | 98.2394636         |
| <i>USH1C</i>            | 96.11912226        |
| <i>USH2A</i>            | 99.37174638        |
| <i>VCL</i>              | 97.91891892        |
| <i>VHL</i>              | 93.20114943        |
| <i>WAS</i>              | 95.21519796        |
| <i>WRN</i>              | 98.73337102        |
| <i>WT1</i>              | 91.23275862        |
| <b>Average coverage</b> | <b>98.17483342</b> |

---

**Table S3.** Amplicons with low overall performance.

| Amplicon      | Gene            | Average_Cov | Median_Cov  |
|---------------|-----------------|-------------|-------------|
| AMPL333665053 | <i>ABCC9</i>    | 0.40862069  | 0.19        |
| AMPL332654447 | <i>ACTN2</i>    | 0.221954023 | 0.1         |
| AMPL332924504 | <i>ANK2</i>     | 0.396781609 | 0.22        |
| AMPL329137616 | <i>ATM</i>      | 0.263448276 | 0.15        |
| AMPL223533360 | <i>ATM</i>      | 0.556206897 | 0.735       |
| AMPL224357617 | <i>ATM</i>      | 0.616091954 | 0.81        |
| AMPL263006586 | <i>ATXN2</i>    | 0.024827586 | 0           |
| AMPL264529884 | <i>ATXN7</i>    | 0.409885057 | 0.44        |
| AMPL333434672 | <i>CACNA1C</i>  | 0.352413793 | 0.11        |
| AMPL332860700 | <i>CACNA1C</i>  | 0.323333333 | 0.155       |
| AMPL332795564 | <i>CACNA1C</i>  | 0.603103448 | 0.725       |
| AMPL316480986 | <i>CD113t-C</i> | 0.51045977  | 0.36        |
| AMPL256851407 | <i>CFTR</i>     | 0.412528736 | 0           |
| AMPL263693016 | <i>CFTR</i>     | 0.342298851 | 0           |
| AMPL258800042 | <i>CHAT</i>     | 0.155747126 | 0.05        |
| AMPL259820389 | <i>CLCN1</i>    | 0.21908046  | 0.13        |
| AMPL268784639 | <i>COL11A1</i>  | 0.084482759 | 0           |
| AMPL267473214 | <i>COL11A2</i>  | 0.100344828 | 0           |
| AMPL261604288 | <i>COL11A2</i>  | 0.477011494 | 0.26        |
| AMPL226082590 | <i>COL1A1</i>   | 0.062528736 | 0           |
| AMPL253629491 | <i>COL1A1</i>   | 0.443793103 | 0.25        |
| AMPL266335107 | <i>COL1A2</i>   | 0.444022989 | 0.24        |
| AMPL267875911 | <i>COL5A1</i>   | 0.178850575 | 0           |
| AMPL264271893 | <i>COL5A1</i>   | 0.462988506 | 0.17        |
| AMPL266962722 | <i>COL5A1</i>   | 0.520344828 | 0.555172414 |
| AMPL269301385 | <i>DNAH11</i>   | 0.494022989 | 0.155       |
| AMPL262828421 | <i>DNAH9</i>    | 0.38183908  | 0.125       |
| AMPL263347778 | <i>DNAI1</i>    | 0.509655172 | 0.56        |
| AMPL264490187 | <i>DOK7</i>     | 0.204252874 | 0.07        |
| AMPL263906362 | <i>DOK7</i>     | 0.145287356 | 0.11        |
| AMPL264184718 | <i>ENG</i>      | 0.273563218 | 0.29        |
| AMPL317483006 | <i>EYA1</i>     | 0.532758621 | 0.56        |
| AMPL229282611 | <i>FGFR3</i>    | 0.40183908  | 0.11        |
| AMPL229752887 | <i>FOXL2</i>    | 0.467241379 | 0.32        |
| AMPL229746185 | <i>FOXL2</i>    | 0.677586207 | 0.67        |
| AMPL317490574 | <i>GAA</i>      | 0.419425287 | 0           |
| AMPL316565936 | <i>GALT</i>     | 0.390114943 | 0           |
| AMPL316923343 | <i>GBE1</i>     | 0.293103448 | 0.21        |
| AMPL320478284 | <i>GDF5</i>     | 0.367701149 | 0.145       |
| AMPL332489562 | <i>HCN4</i>     | 0.392183908 | 0.245       |
| AMPL315970732 | <i>HMBS</i>     | 0.436321839 | 0.285       |
| AMPL317831668 | <i>HR</i>       | 0.680344828 | 0.75        |
| AMPL328551274 | <i>IDUA</i>     | 0.011494253 | 0           |
| AMPL316597329 | <i>IMPDH1</i>   | 0.685977011 | 0.84        |
| AMPL316229103 | <i>JAG1</i>     | 0.530689655 | 0.64        |
| AMPL312881912 | <i>KCNH2</i>    | 0.231494253 | 0.115       |
| AMPL312732660 | <i>KCNH2</i>    | 0.260229885 | 0.285       |
| AMPL314511384 | <i>KCNQ4</i>    | 0.227011494 | 0.05        |
| AMPL313253246 | <i>KIAA0196</i> | 0.508965517 | 0.45        |
| AMPL313342676 | <i>LDB3</i>     | 0.695747126 | 0.697873563 |
| AMPL313342915 | <i>LDB3</i>     | 0.766896552 | 0.79        |
| AMPL313402560 | <i>MAPT</i>     | 0.198965517 | 0           |
| AMPL313034049 | <i>MC1R</i>     | 0.344827586 | 0.205       |
| AMPL314723961 | <i>MC1R</i>     | 0.431034483 | 0.3         |
| AMPL314594164 | <i>MED12</i>    | 0.697356322 | 0.708678161 |
| AMPL231208212 | <i>MEN1</i>     | 0.580114943 | 0.545       |
| AMPL313004422 | <i>MERTK</i>    | 0.581264368 | 0.815       |
| AMPL233218426 | <i>MLH1</i>     | 0.498505747 | 0.47        |
| AMPL313769556 | <i>MYO7A</i>    | 0.528045977 | 0.54        |
| AMPL238333700 | <i>NF1</i>      | 0.513678161 | 0.52183908  |
| AMPL292477743 | <i>NIPBL</i>    | 0.144712644 | 0.11        |
| AMPL257613650 | <i>NRAS</i>     | 0.502298851 | 0.255       |
| AMPL320308769 | <i>OCRL</i>     | 0.357471264 | 0           |



|               |                 |             |             |
|---------------|-----------------|-------------|-------------|
| AMPL320109858 | <i>PABPN1</i>   | 0.057471264 | 0.02        |
| AMPL320132837 | <i>PABPN1</i>   | 0.161609195 | 0.135       |
| AMPL318283880 | <i>PEX1</i>     | 0.358045977 | 0           |
| AMPL321180668 | <i>PEX1</i>     | 0.526666667 | 0.39        |
| AMPL319536438 | <i>PKD1</i>     | 0.532988506 | 0.491494253 |
| AMPL319473951 | <i>PKHD1</i>    | 0.233563218 | 0.25        |
| AMPL318323320 | <i>PLEC</i>     | 0.235977011 | 0.21        |
| AMPL320499907 | <i>PLEC</i>     | 0.674367816 | 0.685       |
| AMPL320625284 | <i>PLEC</i>     | 0.714942529 | 0.815       |
| AMPL323884687 | <i>PSEN2</i>    | 0.435172414 | 0.405       |
| AMPL326400261 | <i>RHO</i>      | 0.189770115 | 0.12        |
| AMPL324248910 | <i>RPGR</i>     | 0.084942529 | 0.09        |
| AMPL326287708 | <i>RYR1</i>     | 0.053678161 | 0           |
| AMPL326287558 | <i>RYR1</i>     | 0.339655172 | 0.13        |
| AMPL324726906 | <i>RYR1</i>     | 0.363908046 | 0.35        |
| AMPL323496723 | <i>RYR1</i>     | 0.522643678 | 0.54        |
| AMPL325586375 | <i>SALL4</i>    | 0.505977011 | 0.155       |
| AMPL332516827 | <i>SCN1B</i>    | 0.347816092 | 0           |
| AMPL323504700 | <i>SEMA4A</i>   | 0.162758621 | 0.12        |
| AMPL323672232 | <i>SIX5</i>     | 0.347931034 | 0.2         |
| AMPL323733372 | <i>SLC25A13</i> | 0.487471264 | 0.34        |
| AMPL324304978 | <i>SLC25A4</i>  | 0.14862069  | 0.13        |
| AMPL272494146 | <i>SMAD3</i>    | 0.680804598 | 0.725       |
| AMPL327047268 | <i>SOS1</i>     | 0.315402299 | 0           |
| AMPL328121251 | <i>SOS1</i>     | 0.535402299 | 0.33        |
| AMPL327622945 | <i>SOX9</i>     | 0.617701149 | 0.64        |
| AMPL327622743 | <i>SOX9</i>     | 0.634367816 | 0.655       |
| AMPL333358745 | <i>STARD3</i>   | 0.349655172 | 0           |
| AMPL303260558 | <i>TAF1</i>     | 0.619885057 | 0.695       |
| AMPL332264093 | <i>TMEM43</i>   | 0.347356322 | 0           |
| AMPL326487987 | <i>TNNT1</i>    | 0.094827586 | 0           |
| AMPL331572195 | <i>TNXB</i>     | 0.457931034 | 0.13        |
| AMPL331905893 | <i>TNXB</i>     | 0.643678161 | 0.51        |
| AMPL331814080 | <i>TNXB</i>     | 0.693563218 | 0.595       |
| AMPL331947764 | <i>TNXB</i>     | 0.666896552 | 0.64        |
| AMPL331756060 | <i>TNXB</i>     | 0.760229885 | 0.84        |
| AMPL327801779 | <i>TULP1</i>    | 0.092528736 | 0           |
| AMPL327024814 | <i>USH1C</i>    | 0.051954023 | 0           |
| AMPL328293814 | <i>USH2A</i>    | 0.622528736 | 0.72        |
| AMPL326701550 | <i>VCL</i>      | 0.372528736 | 0.236264368 |
| AMPL262401836 | <i>WAS</i>      | 0.320229885 | 0.225       |
| AMPL266347323 | <i>WT1</i>      | 0.195287356 | 0.22        |

**Table S4.** List and details of undetected variants.

| Case-ID          | Gene       | Transcript-ID | chromosome | Start         | End           | c.DNA                    | Protein          | Context Sequence                        | Site Coverage (%) | HOMOPOLYMER (Y/N) | High-GC Content (Y/N) | Reason for Variant Detection Failure                         |
|------------------|------------|---------------|------------|---------------|---------------|--------------------------|------------------|-----------------------------------------|-------------------|-------------------|-----------------------|--------------------------------------------------------------|
| SGP201<br>3-0133 | ASP<br>A   | NM_00<br>0049 | 17         | 33977<br>06   | 33977<br>06   | #Frameshift<br>insertion |                  | AAAGTTGATTACCCCCGG<br>GATGAAAATGGAG     | 46x               | Y                 | N                     | presence in homopolymer region                               |
| SGP201<br>4-3064 | ASP<br>A   | NM_00<br>0049 | 17         | 33849<br>72   | 33849<br>73   | #Frameshift<br>insertion |                  | ATTG<br>GTCCAAAAGACAGTGAA<br>GATT CCTAT | 36x               | Y                 | N                     | presence in homopolymer region                               |
| SGP201<br>3-0091 | BCK<br>DHB | NM_00<br>0056 | 6          | 80838<br>889  | 80838<br>892  | c.286_288delGAA          |                  | TCAGTAATATTTGGTGAA<br>GATGTGCCCTTG      | 9x                | N                 | N                     | poor coverage                                                |
| SGP201<br>3-0092 | BCK<br>DHB | NM_00<br>0056 | 6          | 80816<br>411  | 80816<br>411  | c.1A>T                   | p.MIL            | CGGTGGTGAGCGGGGAT<br>GGCGGTTGTAGCGG     | 2x                | Y                 | Y                     | poor coverage, presence in<br>homopolymer and GC-rich region |
| SGP201<br>3-0043 | CFT<br>R   | NM_00<br>0492 | 7          | 11719<br>9543 | 11719<br>9543 | c.1418_14<br>18delG      | p.G473<br>Efs*54 | TAATGGTGATTATGGGAG<br>AACTGGAGCCTTC     | 3x                | Y                 | N                     | poor coverage & presence in<br>homopolymer region            |
| SGP201<br>3-0114 | PAH        | NM_00<br>0277 | 12         | 10326<br>0390 | 10326<br>0390 | #Missense                |                  | GGCGGTAGTTGTAGGCA<br>ATGTCAGCAAACCTG    | 16x               | N                 | N                     | poor coverage                                                |

**Table S5.** Examples of commercial NGS-panels.

| Test Provider                           | Type of test                    | Platform                                      | Link                                                                                                                                                                                                                                                |
|-----------------------------------------|---------------------------------|-----------------------------------------------|-----------------------------------------------------------------------------------------------------------------------------------------------------------------------------------------------------------------------------------------------------|
| Illumina                                | Group of disorders (552 genes)  | Illumina                                      | <a href="https://www.illumina.com/products/by-type/clinical-research-products/trusight-inherited-disease.html">https://www.illumina.com/products/by-type/clinical-research-products/trusight-inherited-disease.html</a>                             |
| Fulgent Diagnostics                     | Individual disorder             | Illumina HiSeq 4000                           | <a href="https://www.fulgentgenetics.com/testgroup/panel">https://www.fulgentgenetics.com/testgroup/panel</a>                                                                                                                                       |
| Center for Genomics and Transcriptomics | Group of disorders (634 genes)  | in-Solution Agilent technology (SureSelectXT) | <a href="http://www.cephor.de/en/diagnostics/diagnostic-panels/epilepsy-metabolic-and-brain-development-disorders/#tab-id-2">http://www.cephor.de/en/diagnostics/diagnostic-panels/epilepsy-metabolic-and-brain-development-disorders/#tab-id-2</a> |
| Blueprint Genetics                      | Group of disorders (354 genes)  | OS-Seq™                                       | <a href="http://metabolic-disorders.blueprintgenetics.com/panels/comprehensive-metabolism-panel/">http://metabolic-disorders.blueprintgenetics.com/panels/comprehensive-metabolism-panel/</a>                                                       |
| Otogenetics                             | Group of disorders (4500 genes) | Illumina HiSeq                                | <a href="https://www.otogenetics.com/genepanel/inherited-disease-panel">https://www.otogenetics.com/genepanel/inherited-disease-panel</a>                                                                                                           |

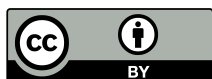

© 2018 by the authors; licensee MDPI, Basel, Switzerland. This article is an open access article distributed under the terms and conditions of the Creative Commons Attribution (CC BY) license (<http://creativecommons.org/licenses/by/4.0/>).
